# Supplementary material
Source: PubMed Central journal article supplement (PMC3257186)
Supplement: neo1312_1113SD1.pdf [file neo1312_1113SD1.pdf]

**Table W1.** Summary of Clinical and Molecular Data of 73 Primary GBMs at First Surgery.

| Patient No. | Age (Years)/Sex | KPS | RPA Class | Surgical Resection | Ki67 (%) | EGFRvIII | MGMT | PTEN | Overall Survival (Months) |
|-------------|-----------------|-----|-----------|--------------------|----------|----------|------|------|---------------------------|
| 1           | 54/F            | 80  | IV        | P                  | 40       | +        | M    | +    | 35                        |
| 2           | 72/F            | 40  | VI        | T                  | 40       | -        | M    | +    | 3.5                       |
| 3           | 42/F            | 90  | III       | T                  | 15       | +        | M    | +    | 75                        |
| 4           | 69/M            | 80  | IV        | T                  | 40       | +        | M    | +    | 12.5                      |
| 5           | 56/M            | 50  | VI        | T                  | 15       | -        | UM   | -    | 2                         |
| 6           | 47/M            | 70  | IV        | P                  | 35       | -        | M    | -    | 12.5                      |
| 7           | 56/M            | 90  | IV        | T                  | 20       | +        | UM   | +    | 12                        |
| 8           | 66/M            | 90  | IV        | T                  | 40       | -        | UM   | -    | 12                        |
| 9           | 51/F            | 50  | V         | T                  | 50       | -        | UM   | +    | 11                        |
| 10          | 75/F            | 50  | V         | P                  | 20       | +        | UM   | -    | 5.5                       |
| 11          | 61/M            | 60  | VI        | T                  | 40       | -        | UM   | -    | 9                         |
| 12          | 56/M            | 60  | V         | T                  | 25       | +        | M    | -    | 23                        |
| 13          | 61/M            | 50  | VI        | T                  | 30       | -        | UM   | +    | 2                         |
| 14          | 59/F            | 60  | V         | T                  | 50       | +        | UM   | +    | 10                        |
| 15          | 77/F            | 50  | V         | T                  | 20       | +        | UM   | +    | 6.5                       |
| 16          | 30/F            | 90  | III       | T                  | 50       | +        | M    | +    | 55                        |
| 17          | 77/M            | 90  | V         | T                  | 60       | +        | UM   | -    | 9                         |
| 18          | 69/M            | 70  | V         | T                  | 50       | -        | M    | +    | 4                         |
| 19          | 72/F            | 80  | V         | T                  | 5        | +        | UM   | -    | 7.5                       |
| 20          | 76/M            | 90  | V         | P                  | 8        | -        | UM   | +    | 7.5                       |
| 21          | 62/F            | 80  | V         | T                  | 20       | +        | UM   | +    | 6                         |
| 22          | 47/M            | 90  | III       | T                  | 30       | -        | M    | -    | 7                         |
| 23          | 49/M            | 70  | IV        | P                  | 15       | +        | M    | +    | 36                        |
| 24          | 64/F            | 50  | VI        | P                  | 35       | -        | M    | +    | 6                         |
| 25          | 53/F            | 70  | V         | T                  | 25       | -        | UM   | +    | 15                        |
| 26          | 67/F            | 50  | V         | T                  | 20       | -        | UM   | -    | 5                         |
| 27          | 58/F            | 80  | V         | P                  | 25       | +        | UM   | +    | 2                         |
| 28          | 51/F            | 50  | V         | T                  | 20       | -        | UM   | -    | 21                        |
| 29          | 68/M            | 80  | V         | T                  | 15       | +        | UM   | +    | 24                        |
| 30          | 64/F            | 60  | VI        | T                  | 10       | +        | M    | +    | 19                        |
| 31          | 55/M            | 80  | V         | P                  | 30       | +        | M    | +    | 7                         |
| 32          | 46/M            | 60  | IV        | P                  | 10       | -        | M    | -    | 6.5                       |
| 33          | 72/M            | 40  | V         | T                  | 20       | -        | UM   | +    | 11                        |
| 34          | 54/F            | 60  | V         | T                  | 5        | +        | UM   | +    | 18                        |
| 35          | 48/F            | 70  | IV        | T                  | 15       | -        | M    | +    | 6                         |
| 36          | 58/M            | 60  | V         | T                  | 10       | -        | UM   | +    | 10.5                      |
| 37          | 51/M            | 90  | IV        | P                  | 25       | -        | UM   | +    | 12.5                      |
| 38          | 73/M            | 50  | VI        | T                  | 25       | -        | UM   | -    | 2                         |
| 39          | 66/M            | 90  | V         | P                  | 10       | -        | UM   | -    | 11                        |
| 40          | 59/M            | 80  | V         | T                  | 35       | +        | UM   | +    | 6                         |
| 41          | 64/M            | 80  | V         | T                  | 10       | -        | M    | +    | 14                        |
| 42          | 74/M            | 60  | VI        | T                  | 15       | -        | M    | -    | 5.5                       |
| 43          | 50/M            | 90  | IV        | T                  | 30       | -        | M    | -    | 11                        |
| 44          | 62/F            | 60  | VI        | T                  | 35       | +        | M    | -    | 19                        |
| 45          | 20/M            | 90  | III       | T                  | 20       | +        | M    | -    | 27.5                      |
| 46          | 70/F            | 60  | V         | T                  | 15       | +        | UM   | +    | 8                         |
| 47          | 70/M            | 50  | VI        | T                  | 20       | -        | M    | +    | 9                         |
| 48          | 66/M            | 30  | VI        | T                  | 25       | -        | M    | +    | 3.5                       |
| 49          | 52/F            | 60  | V         | T                  | 20       | +        | M    | -    | 26                        |
| 50          | 64/M            | 90  | IV        | T                  | 15       | -        | M    | -    | 15                        |
| 51          | 53/M            | 80  | V         | T                  | 30       | +        | UM   | +    | 11                        |
| 52          | 61/M            | 90  | IV        | T                  | 15       | -        | M    | -    | 22                        |
| 53          | 58/M            | 70  | V         | T                  | 35       | +        | UM   | -    | 12.5                      |
| 54          | 56/F            | 90  | IV        | T                  | 25       | +        | UM   | -    | 12                        |
| 55          | 52/M            | 60  | VI        | T                  | 50       | +        | UM   | +    | 10                        |
| 56          | 67/M            | 70  | V         | T                  | 30       | -        | M    | -    | 7.5                       |
| 57          | 75/F            | 30  | VI        | T                  | 50       | -        | UM   | -    | 2                         |
| 58          | 48/M            | 80  | IV        | T                  | 50       | +        | M    | -    | 4                         |
| 59          | 67/F            | 60  | V         | T                  | 20       | +        | UM   | -    | 20                        |
| 60          | 71/F            | 60  | V         | P                  | 20       | -        | M    | +    | 3                         |
| 61          | 76/F            | 60  | V         | P                  | 25       | +        | M    | -    | 4                         |
| 62          | 52/M            | 90  | IV        | T                  | 30       | -        | UM   | +    | 20                        |
| 63          | 69/F            | 40  | VI        | T                  | 25       | +        | UM   | -    | 3                         |
| 64          | 48/M            | 30  | IV        | T                  | 25       | -        | UM   | -    | 2                         |
| 65          | 69/F            | 60  | VI        | T                  | 25       | -        | UM   | +    | 11                        |
| 66          | 52/M            | 60  | V         | P                  | 20       | -        | UM   | +    | 19                        |
| 67          | 58/M            | 40  | VI        | T                  | 30       | -        | UM   | +    | 8                         |
| 68          | 55/M            | 50  | V         | T                  | 50       | -        | UM   | +    | 2                         |
| 69          | 68/M            | 50  | VI        | T                  | 25       | +        | UM   | -    | 8                         |
| 70          | 80/M            | 70  | V         | T                  | 25       | +        | M    | +    | 4.5                       |
| 71          | 33/M            | 50  | IV        | T                  | 20       | +        | M    | +    | 65                        |
| 72          | 67/F            | 60  | V         | T                  | 10       | -        | UM   | +    | 10                        |
| 73          | 59/M            | 70  | IV        | T                  | 10       | +        | M    | +    | 18                        |

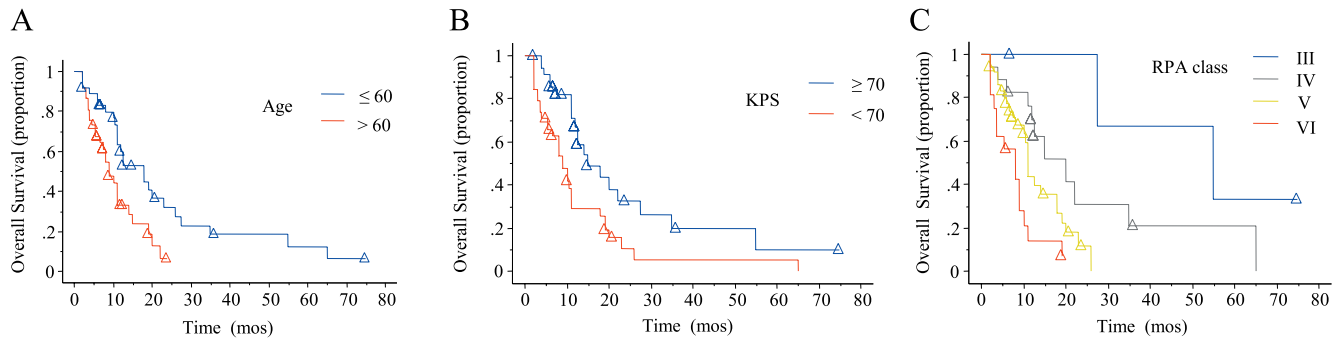

**Figure W1.** Kaplan-Meier survival curves of 73 GBM patients stratified by age, KPS, and RPA class. (A) Age 60 years or younger (blue line) conferred a favorable survival advantage ( $P = .0069$ ). (B) KPS score of 70 or higher (blue line) was related with longer OS ( $P = .0035$ ). (C) RPA classes III-IV (blue and gray lines) were associated with longer OS ( $P = .0007$ ). There were no differences in survival times between the RPA class V (yellow line) and VI (red line).

**Table W2.** Summary of Clinical and Molecular Data of 14 Recurrent GBMs.

| Patient No. | KPS | RPA Class | Time for Recurrence (Months) | Ki67 (%) | EGFRvIII | MGMT | PTEN | Survival after Recurrence (Months) |
|-------------|-----|-----------|------------------------------|----------|----------|------|------|------------------------------------|
| 1           | 70  | V         | 28                           | 40       | +        | M    | +    | 7                                  |
| 12          | 60  | V         | 18                           | 20       | +        | M    | -    | 5                                  |
| 16          | 80  | IV        | 48                           | 50       | +        | UM   | +    | 7                                  |
| 23          | 70  | IV        | 26                           | 12       | +        | UM   | +    | 10                                 |
| 28          | 50  | V         | 17                           | 25       | -        | M    | -    | 4                                  |
| 30          | 60  | VI        | 13                           | 10       | +        | M    | +    | 6                                  |
| 43          | 80  | V         | 9                            | 30       | -        | M    | -    | 2                                  |
| 50          | 90  | IV        | 8                            | 25       | -        | M    | -    | 7                                  |
| 51          | 80  | V         | 7                            | 40       | +        | UM   | +    | 4                                  |
| 52          | 80  | V         | 13                           | 20       | -        | M    | -    | 9                                  |
| 55          | 60  | VI        | 8.5                          | 40       | +        | UM   | +    | 1.5                                |
| 59          | 60  | V         | 17                           | 20       | +        | UM   | -    | 3                                  |
| 71          | 50  | IV        | 58                           | 30       | +        | M    | +    | 7                                  |
| 73          | 60  | V         | 12                           | 25       | +        | M    | +    | 6                                  |

**Table W3.** Multivariate Analysis for OS.

| Covariate       | <i>b</i> | SE     | <i>P</i>     | Exp( <i>b</i> ) | 95% CI of Exp( <i>b</i> ) |
|-----------------|----------|--------|--------------|-----------------|---------------------------|
| EGFRvIII        | -0.8330  | 0.3346 | <b>.0128</b> | 0.4347          | 0.2264-0.8349             |
| Age             | 0.7596   | 0.3218 | <b>.0182</b> | 2.1374          | 1.1412-4.0033             |
| KPS             | -0.8524  | 0.3069 | <b>.0055</b> | 0.4264          | 0.2344-0.7757             |
| Ki67            | 0.8817   | 0.2993 | <b>.0032</b> | 2.4150          | 1.3472-4.3292             |
| MGMT status     | -0.3326  | 0.3334 | .3186        | 0.7171          | 0.3743-1.3739             |
| PTEN expression | 0.1591   | 0.3018 | .5979        | 1.1725          | 0.6509-2.1120             |
| Resection       | 0.0679   | 0.4316 | .8749        | 1.0703          | 0.4613-2.4832             |

In **bold** the statistically significant  $P(P < .05)$ .

**Table W4.** Molecular Profile of Parent GBM and Neurosphere Cell Cultures.

| No. | GBM Neurosphere Cultures |      |        |           |      |        |           |      |        |
|-----|--------------------------|------|--------|-----------|------|--------|-----------|------|--------|
|     | Parent GBM Tissue        |      |        | Culture A |      |        | Culture B |      |        |
|     | EGFRvIII                 | MGMT | PTEN   | EGFRvIII  | MGMT | PTEN   | EGFRvIII  | MGMT | PTEN   |
| 1   | Positive                 | M    | Normal | Negative  | UM   | Normal | Positive  | UM   | Normal |
| 2   | Positive                 | M    | Normal | Positive  | M    | Normal | Negative  | M    | Normal |
| 3   | Negative                 | UM   | Low    | Negative  | M    | Low    | Negative  | UM   | Low    |

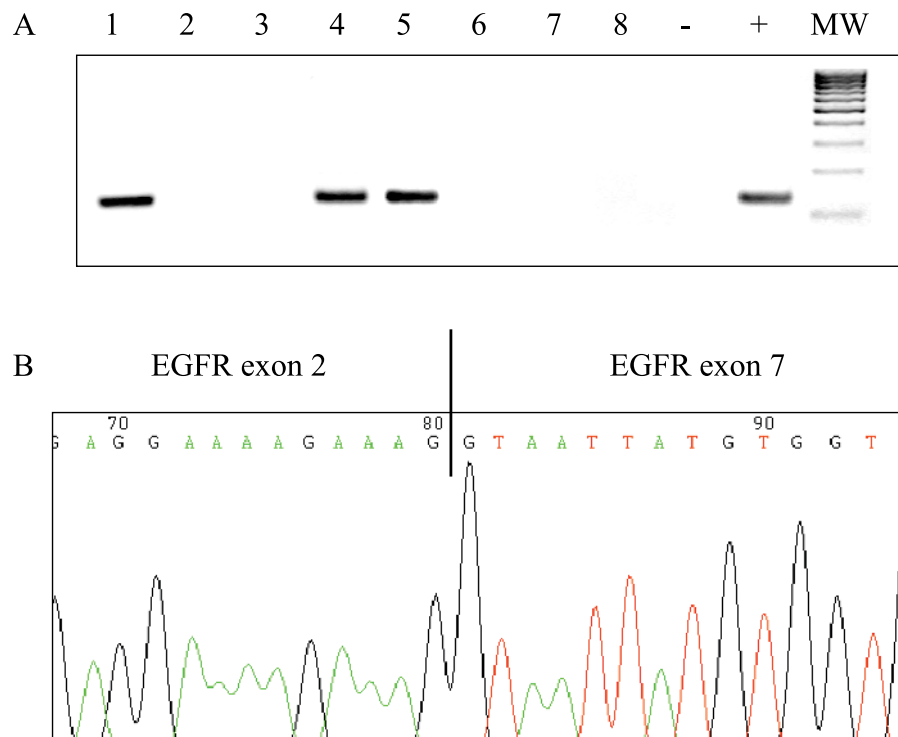

**Figure W2.** RT-PCR assessment for EGFRvIII on selected regions of formalin-fixed paraffin-embedded tumor specimens. (A) EGFRvIII RT-PCR performed on eight GBMs representative cases. The EGFRvIII is present only in samples 1, 4, and 5. Water was used as negative control (-) and plasmid containing EGFRvIII as positive control (+). MW indicates molecular weight marker. (B) Partial sequence of EGFR cDNA showing the deletion of EGFRvIII.

**Table W5.** Summary of Studies on EGFRvIII Expression and Prognosis of GBM Patients.

| Author, Year                             | No. Cases | Technique                          | Results                                                   | Proposed Mechanism                                  |
|------------------------------------------|-----------|------------------------------------|-----------------------------------------------------------|-----------------------------------------------------|
| Feldkamp et al., 1999*                   | 12        | IHC, RT-PCR, Western blot analysis | Worse prognosis (ns)                                      | None                                                |
| Shinojima et al., 2003 <sup>†</sup>      | 87        | IHC                                | Worse prognosis (s)                                       | EGFR amplification                                  |
| Aldape et al., 2004 <sup>‡</sup>         | 105       | IHC, RT-PCR                        | No prognostic value, worse prognosis in AAs               | EGFRvIII as marker of GBM-like cells in AAs         |
| Heimberger et al., 2005 <sup>§</sup>     | 196       | IHC                                | Worse prognosis for patients surviving >1 year            | Cell proliferation (ns), ependymal involvement (ns) |
| Liu et al., 2005 <sup>¶</sup>            | 160       | RT-PCR                             | No prognostic value                                       | Older age in AAs                                    |
| Heimberger et al., 2005 <sup>¶</sup>     | 54        | IHC                                | No prognostic value                                       | None                                                |
| Mellinghoff et al., 2005**               | 50        | IHC, RT-PCR, Western blot analysis | Better prognosis in the erlotinib arm                     | PTEN coexpression                                   |
| Pelloski et al., 2007 <sup>††</sup>      | 509       | IHC                                | Worse prognosis (s)                                       | None                                                |
| Viana-Pereira et al., 2008 <sup>‡‡</sup> | 27        | IHC                                | No prognostic value                                       | None                                                |
| Brown et al., 2008 <sup>§§</sup>         | 81        | IHC                                | No prognostic value                                       | None                                                |
| van den Bent et al., 2009 <sup>¶¶</sup>  | 49        | IHC                                | No prognostic value, worse prognosis in the erlotinib arm | None                                                |
| Thiessen et al., 2010 <sup>###</sup>     | 16        | Real-time PCR                      | No prognostic value                                       | None                                                |
| Reardon et al., 2010 <sup>***</sup>      | 20        | IHC                                | No prognostic value                                       | None                                                |

AA indicates anaplastic astrocytoma; IHC, immunohistochemistry; ns, not significant; s, significant.

\*Feldkamp MM, Lala P, Lau N, Roncari L, and Guha A (1999). Expression of activated epidermal growth factor receptors, Ras-guanosine triphosphate, and mitogen-activated protein kinase in human glioblastoma multiforme specimens. *Neurosurgery* **45**, 1442–1453.

<sup>†</sup>Shinojima N, Tada K, Shiraiishi S, Kamiyo T, Kochi M, Nakamura H, Makino K, Saya H, Hirano H, Kuratsu J, et al. (2003). Prognostic value of epidermal growth factor receptor in patients with glioblastoma multiforme. *Cancer Res* **63**, 6962–6970.

<sup>‡</sup>Aldape KD, Ballman K, Furth A, Buckner JC, Giannini C, Burger PC, Scheithauer BW, Jenkins RB, and James CD (2004). Immunohistochemical detection of EGFRvIII in high malignancy grade astrocytomas and evaluation of prognostic significance. *J Neuropathol Exp Neurol* **63**, 700–707.

<sup>§</sup>Heimberger AB, Hlatky R, Suki D, Yang D, Weinberg J, Gilbert M, Sawaya R, and Aldape K (2005). Prognostic effect of epidermal growth factor receptor and EGFRvIII in glioblastoma multiforme patients. *Clin Cancer Res* **11**, 1462–1466.

<sup>¶</sup>Liu L, Bäcklund LM, Nilsson BR, Grandér D, Ichimura K, Goike HM, and Collins VP (2005). Clinical significance of EGFR amplification and the aberrant EGFRvIII transcript in conventionally treated astrocytic gliomas. *J Mol Med (Berl)* **83**, 917–926.

<sup>¶¶</sup>Heimberger AB, Suki D, Yang D, Shi W, and Aldape K (2005). The natural history of EGFR and EGFRvIII in glioblastoma patients. *J Transl Med* **3**, 38.

<sup>\*\*</sup>Mellinghoff IK, Wang MY, Vivanco I, Haas-Kogan DA, Zhu S, Dia EQ, Lu KV, Yoshimoto K, Huang JH, Chute DJ, et al. (2005). Molecular determinants of the response of glioblastomas to EGFR kinase inhibitors. *N Engl J Med* **353**, 2012–2024.

<sup>††</sup>Pelloski CE, Ballman KV, Furth AF, Zhang L, Lin E, Sulman EP, Bhat K, McDonald JM, Yung WK, Colman H, et al. (2007). Epidermal growth factor receptor variant III status defines clinically distinct subtypes of glioblastoma. *J Clin Oncol* **25**, 2288–2294.

<sup>‡‡</sup>Viana-Pereira M, Lopes JM, Little S, Milanezi F, Basto D, Pardal F, Jones C, and Reis RM (2008). Analysis of EGFR overexpression, EGFR gene amplification and the EGFRvIII mutation in Portuguese high-grade gliomas. *Anticancer Res* **28**, 913–920.

<sup>§§</sup>Brown PD, Krishnan S, Sarkaria JN, Wu W, Jaeckle KA, Uhm JH, Geoffroy FJ, Arusell R, Kitange G, Jenkins RB, et al. (2008). Phase I/II trial of erlotinib and temozolomide with radiation therapy in the treatment of newly diagnosed glioblastoma multiforme: North Central Cancer Treatment Group Study N0177. *J Clin Oncol* **26**, 5603–5609.

<sup>¶¶</sup>van den Bent MJ, Brandes AA, Rampling R, Kouwenhoven MCM, Kros JM, Carpentier AF, Clement PM, Frenay M, Campone M, Baurain JF, et al. (2009). Randomized phase II trial of erlotinib versus temozolomide or carmustine in recurrent glioblastoma: EORTC Brain Tumor Group Study 26034. *J Clin Oncol* **27**, 1268–1274.

<sup>###</sup>Thiessen B, Stewart C, Tsao M, Kamel-Reid S, Schaiquevich P, Mason W, Easaw J, Belanger K, Forsyth P, McIntosh L, et al. (2010). A phase I/II trial of GW572016 (lapatinib) in recurrent glioblastoma multiforme: clinical outcomes, pharmacokinetics and molecular correlation. *Cancer Chemother Pharmacol* **65**, 353–361.

<sup>\*\*\*</sup>Reardon DA, Desjardins A, Vredenburgh JJ, Gururangan S, Friedman AH, Herndon JE II, Marcello J, Norfleet JA, McLendon RE, Sampson JH, et al. (2010). Phase 2 trial of erlotinib plus sirolimus in adults with recurrent glioblastoma. *J Neurooncol* **96**, 219–230.
